# Supplementary material for: Three-dimensional yielding in anisotropic materials: validation of Hill's criterion
Source: Royal Society of Chemistry journal article supplement (doi:10.1039/c9sm00492k), 2019-01-01
Supplement: c9sm00492k1.pdf [file c9sm00492k1.pdf]

## Supplementary information

### Three-Dimensional Yielding in Anisotropic Materials: Validation of Hill Criterion

Manish Kaushal\* and Yogesh M Joshi<sup>1</sup>

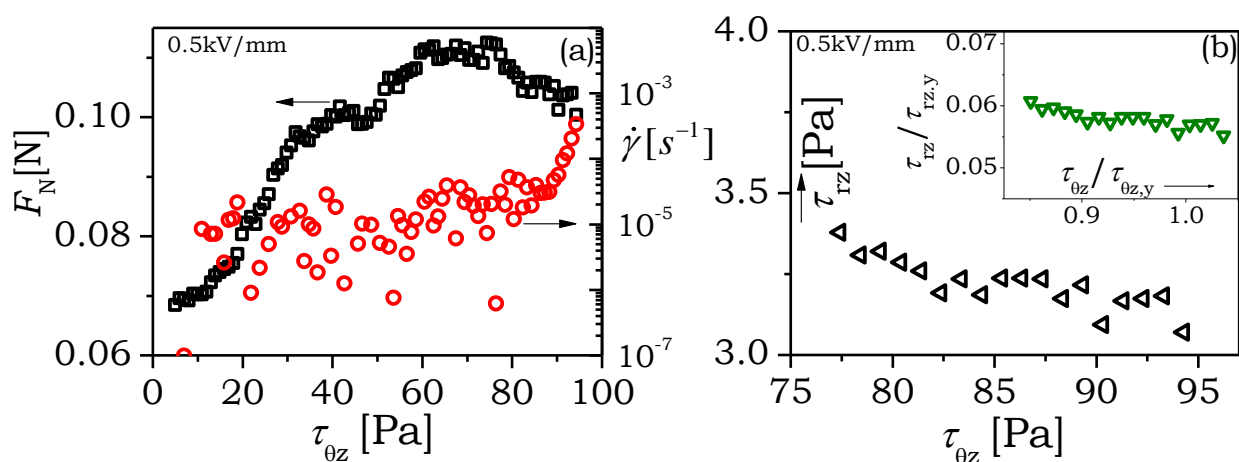

Figure SI-1: For the Corn-starch suspension, (a) Normal force ( $F_N$ ) experienced by the rheometer top plate and the corresponding rotational shear rate ( $\dot{\gamma}$ ) is plotted as a function of rotational shear stress ( $\tau_{\theta z}$ ) till the yield point in the purely rotational experiment. For the same system, (b) Radial shear stress ( $\tau_{rz}$ ) is plotted as a function of rotational shear stress ( $\tau_{\theta z}$ ). In the inset of (b)  $\tau_{rz}/\tau_{rz,y}$  is plotted with respect to  $\tau_{\theta z}/\tau_{\theta z,y}$ . All the above results are obtained at  $E = 0.5$  kV/mm.

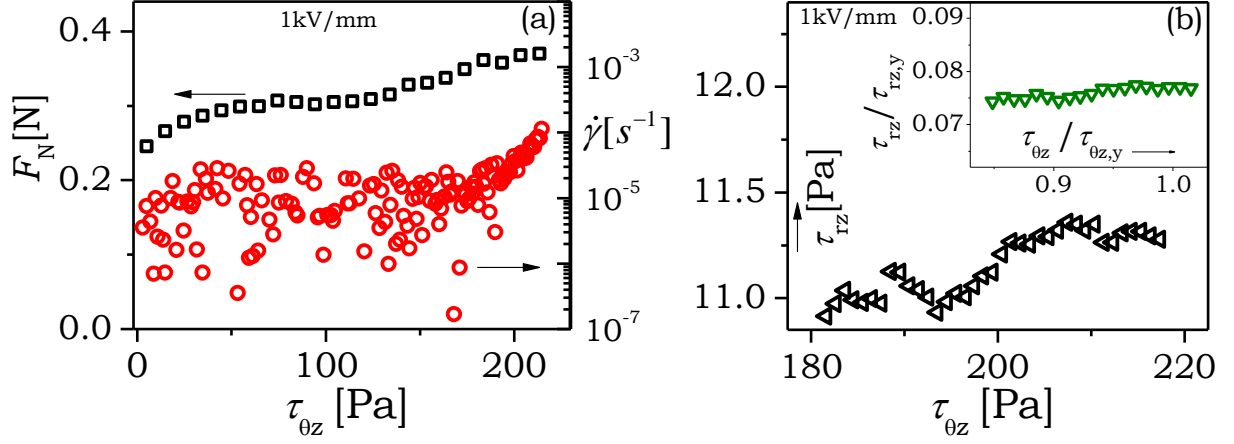

Figure SI-2: For the Corn-starch suspension (a) Normal force ( $F_N$ ) experienced by the rheometer top plate and the corresponding rotational shear rate ( $\dot{\gamma}$ ) is plotted as a function of rotational shear stress ( $\tau_{\theta z}$ ) till the yield point in the purely rotational experiment. For the same system (b) Radial shear stress ( $\tau_{rz}$ ) is plotted as a function of rotational shear stress ( $\tau_{\theta z}$ ). In the inset of (b)  $\tau_{rz}/\tau_{rz,y}$  is plotted with respect to  $\tau_{\theta z}/\tau_{\theta z,y}$ . All the above results are obtained at  $E = 1.0$  kV/mm.
